# Supplementary material
Source: PubMed Central journal article supplement (PMC4860256)

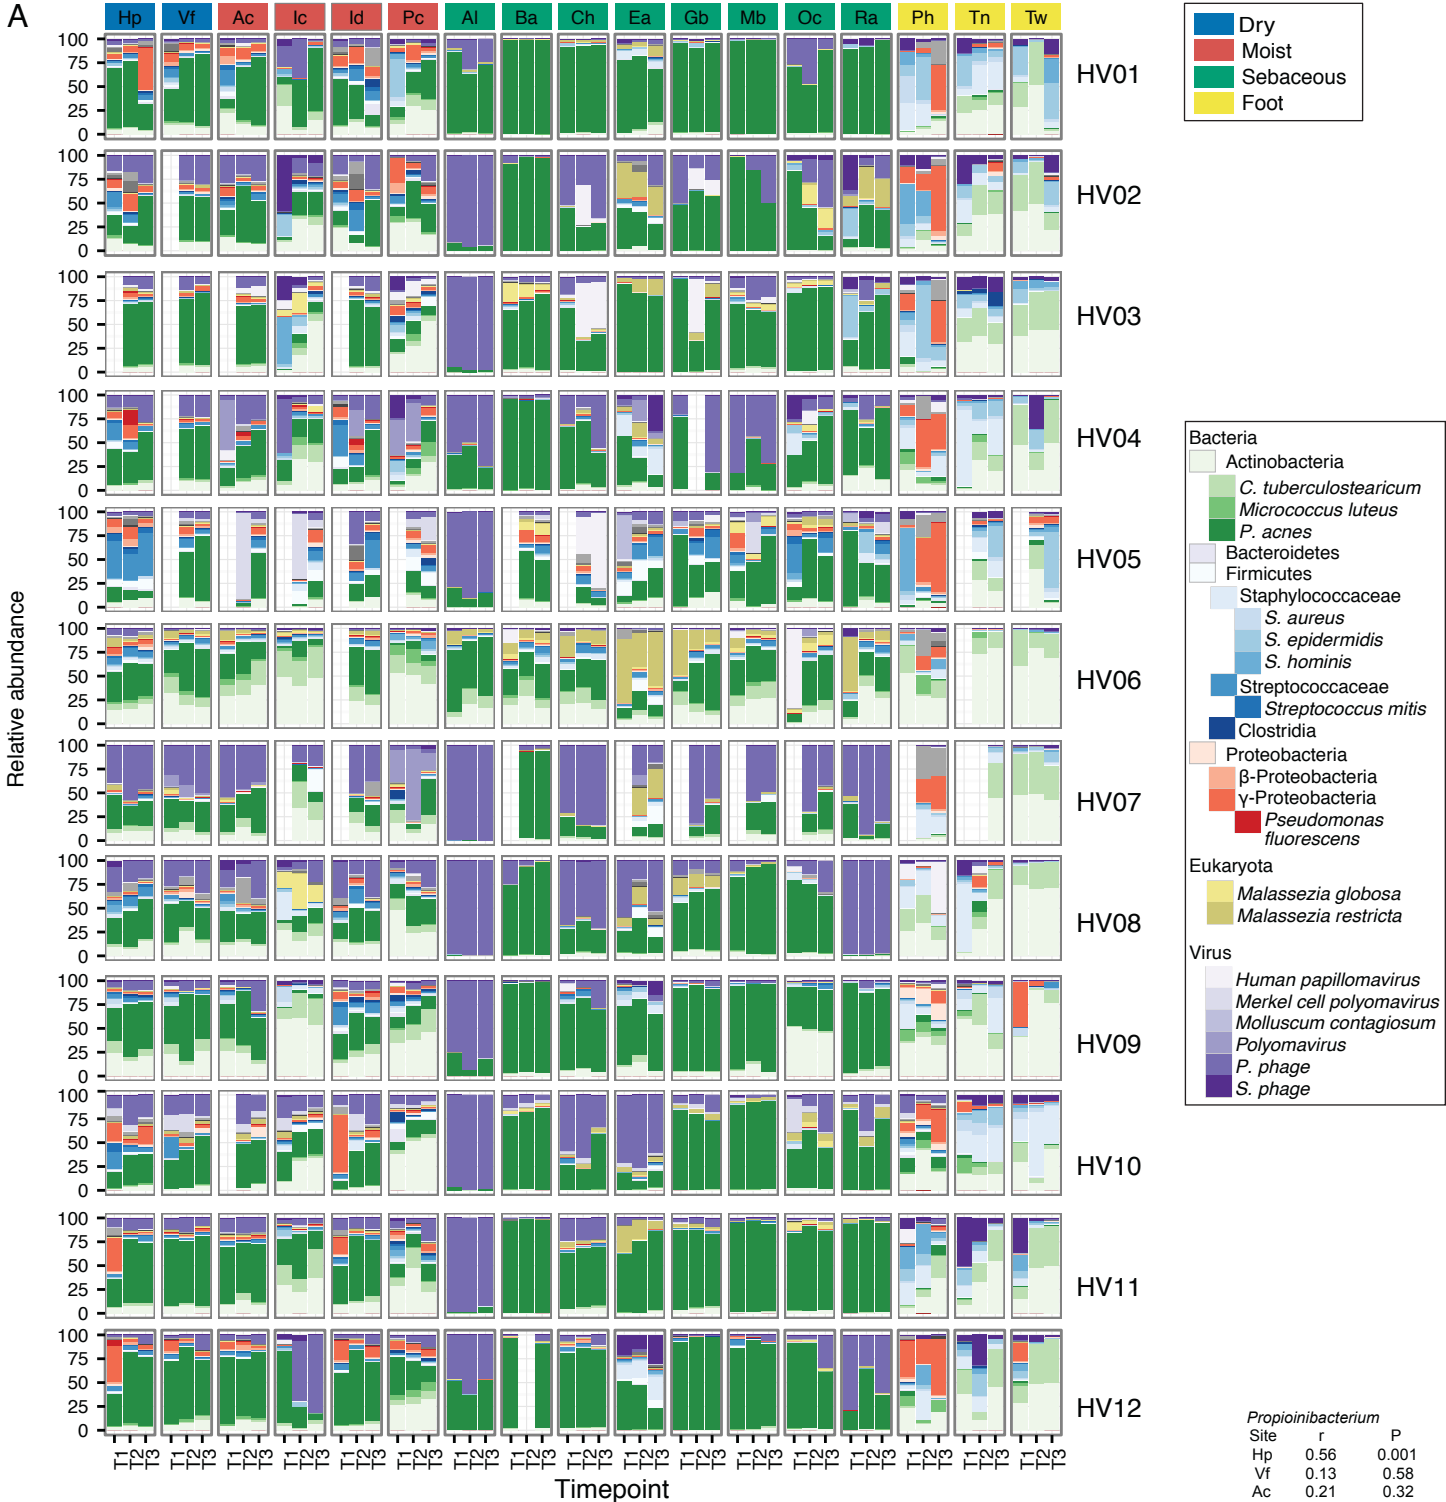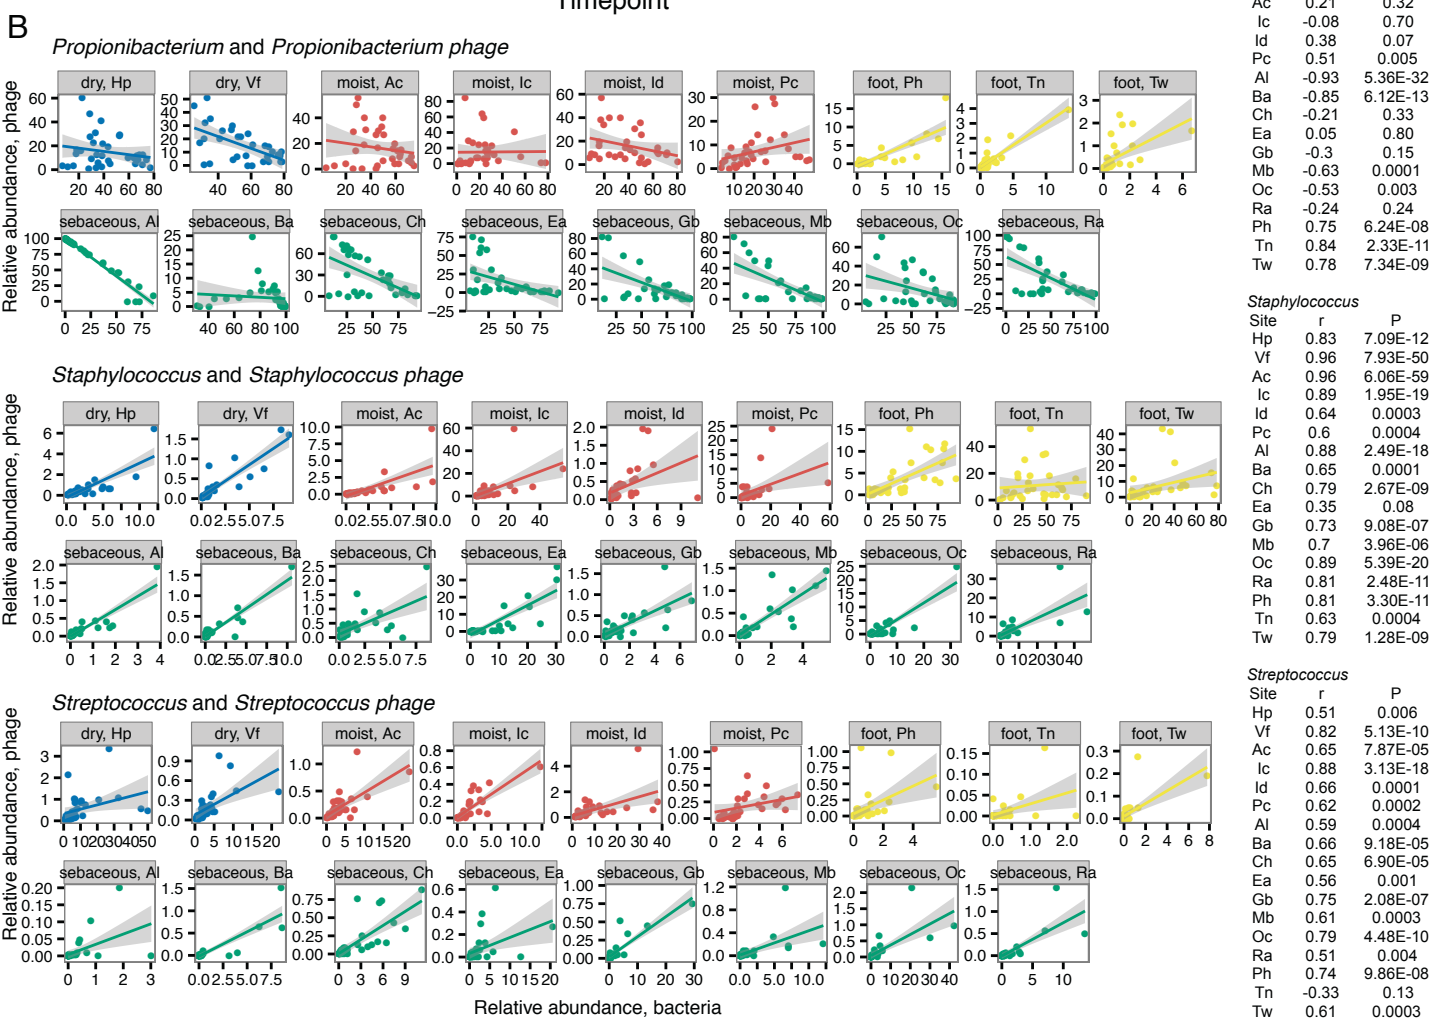

Supplement: NIHMS776449-supplement-4.pdf [file NIHMS776449-supplement-4.pdf]

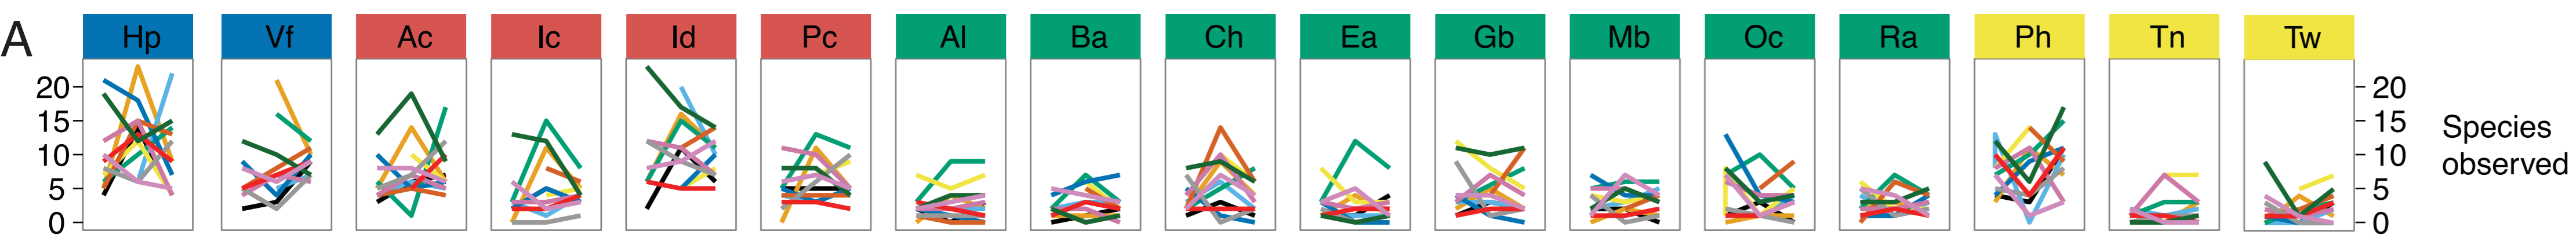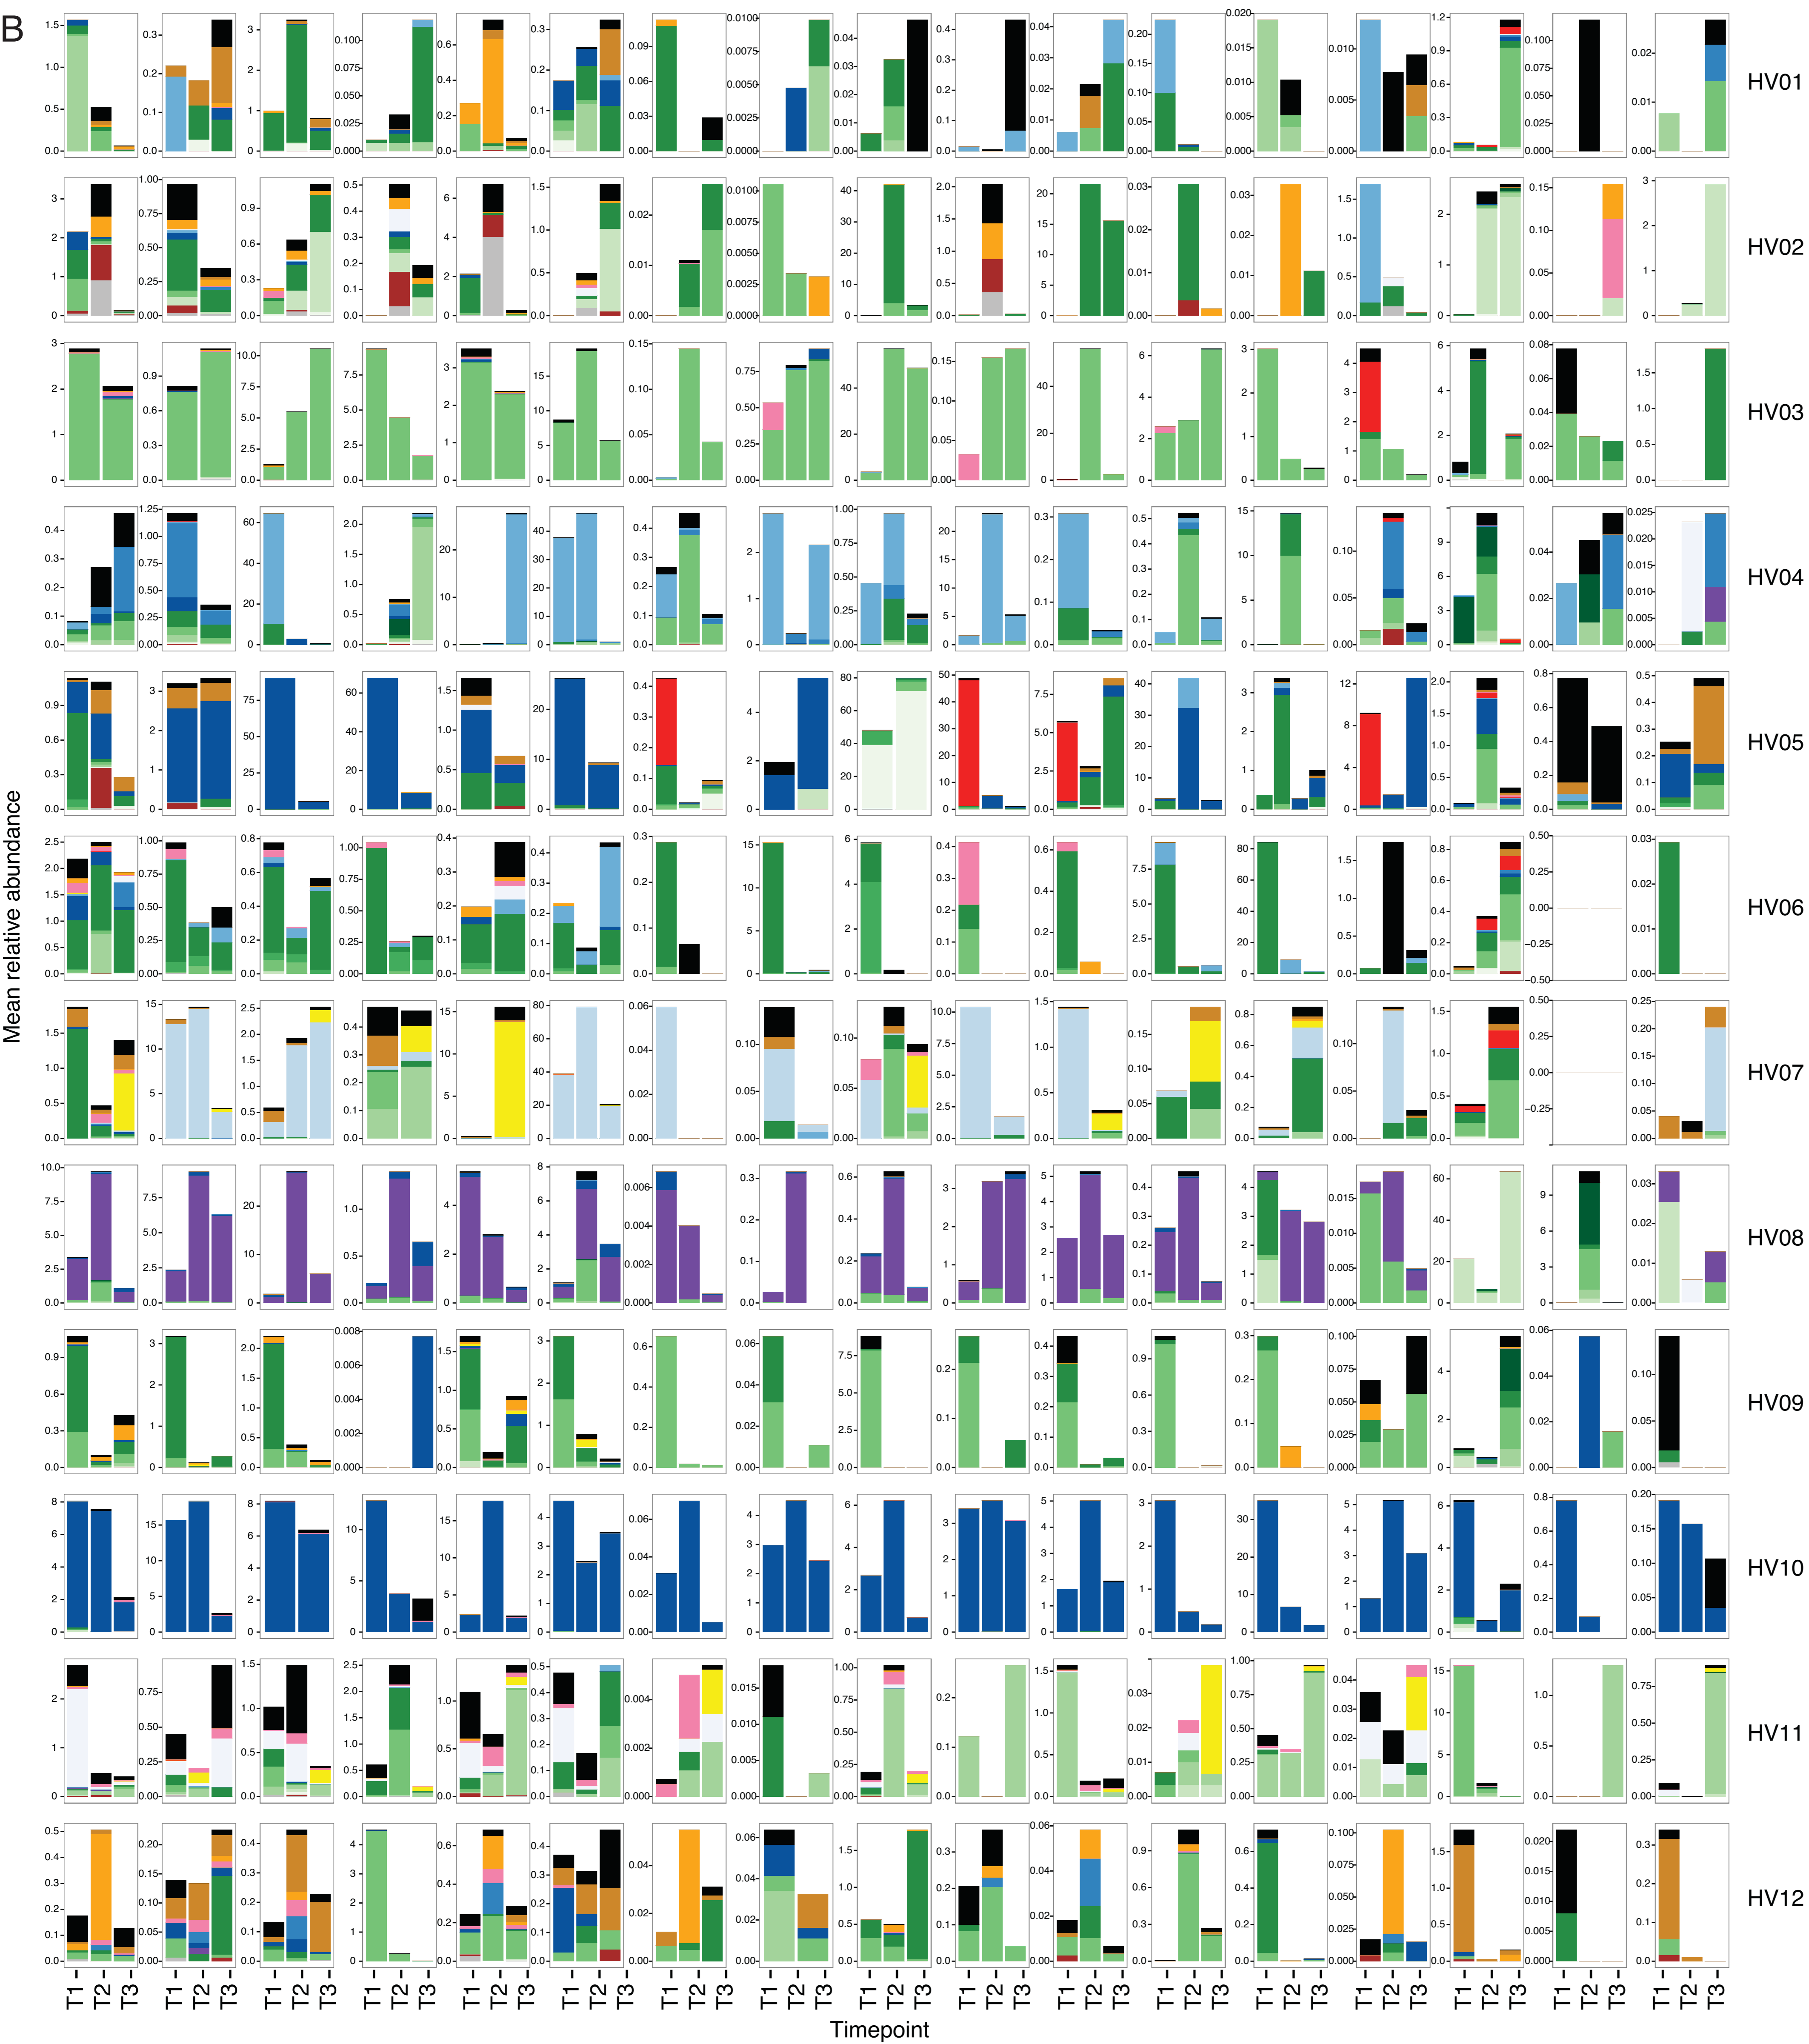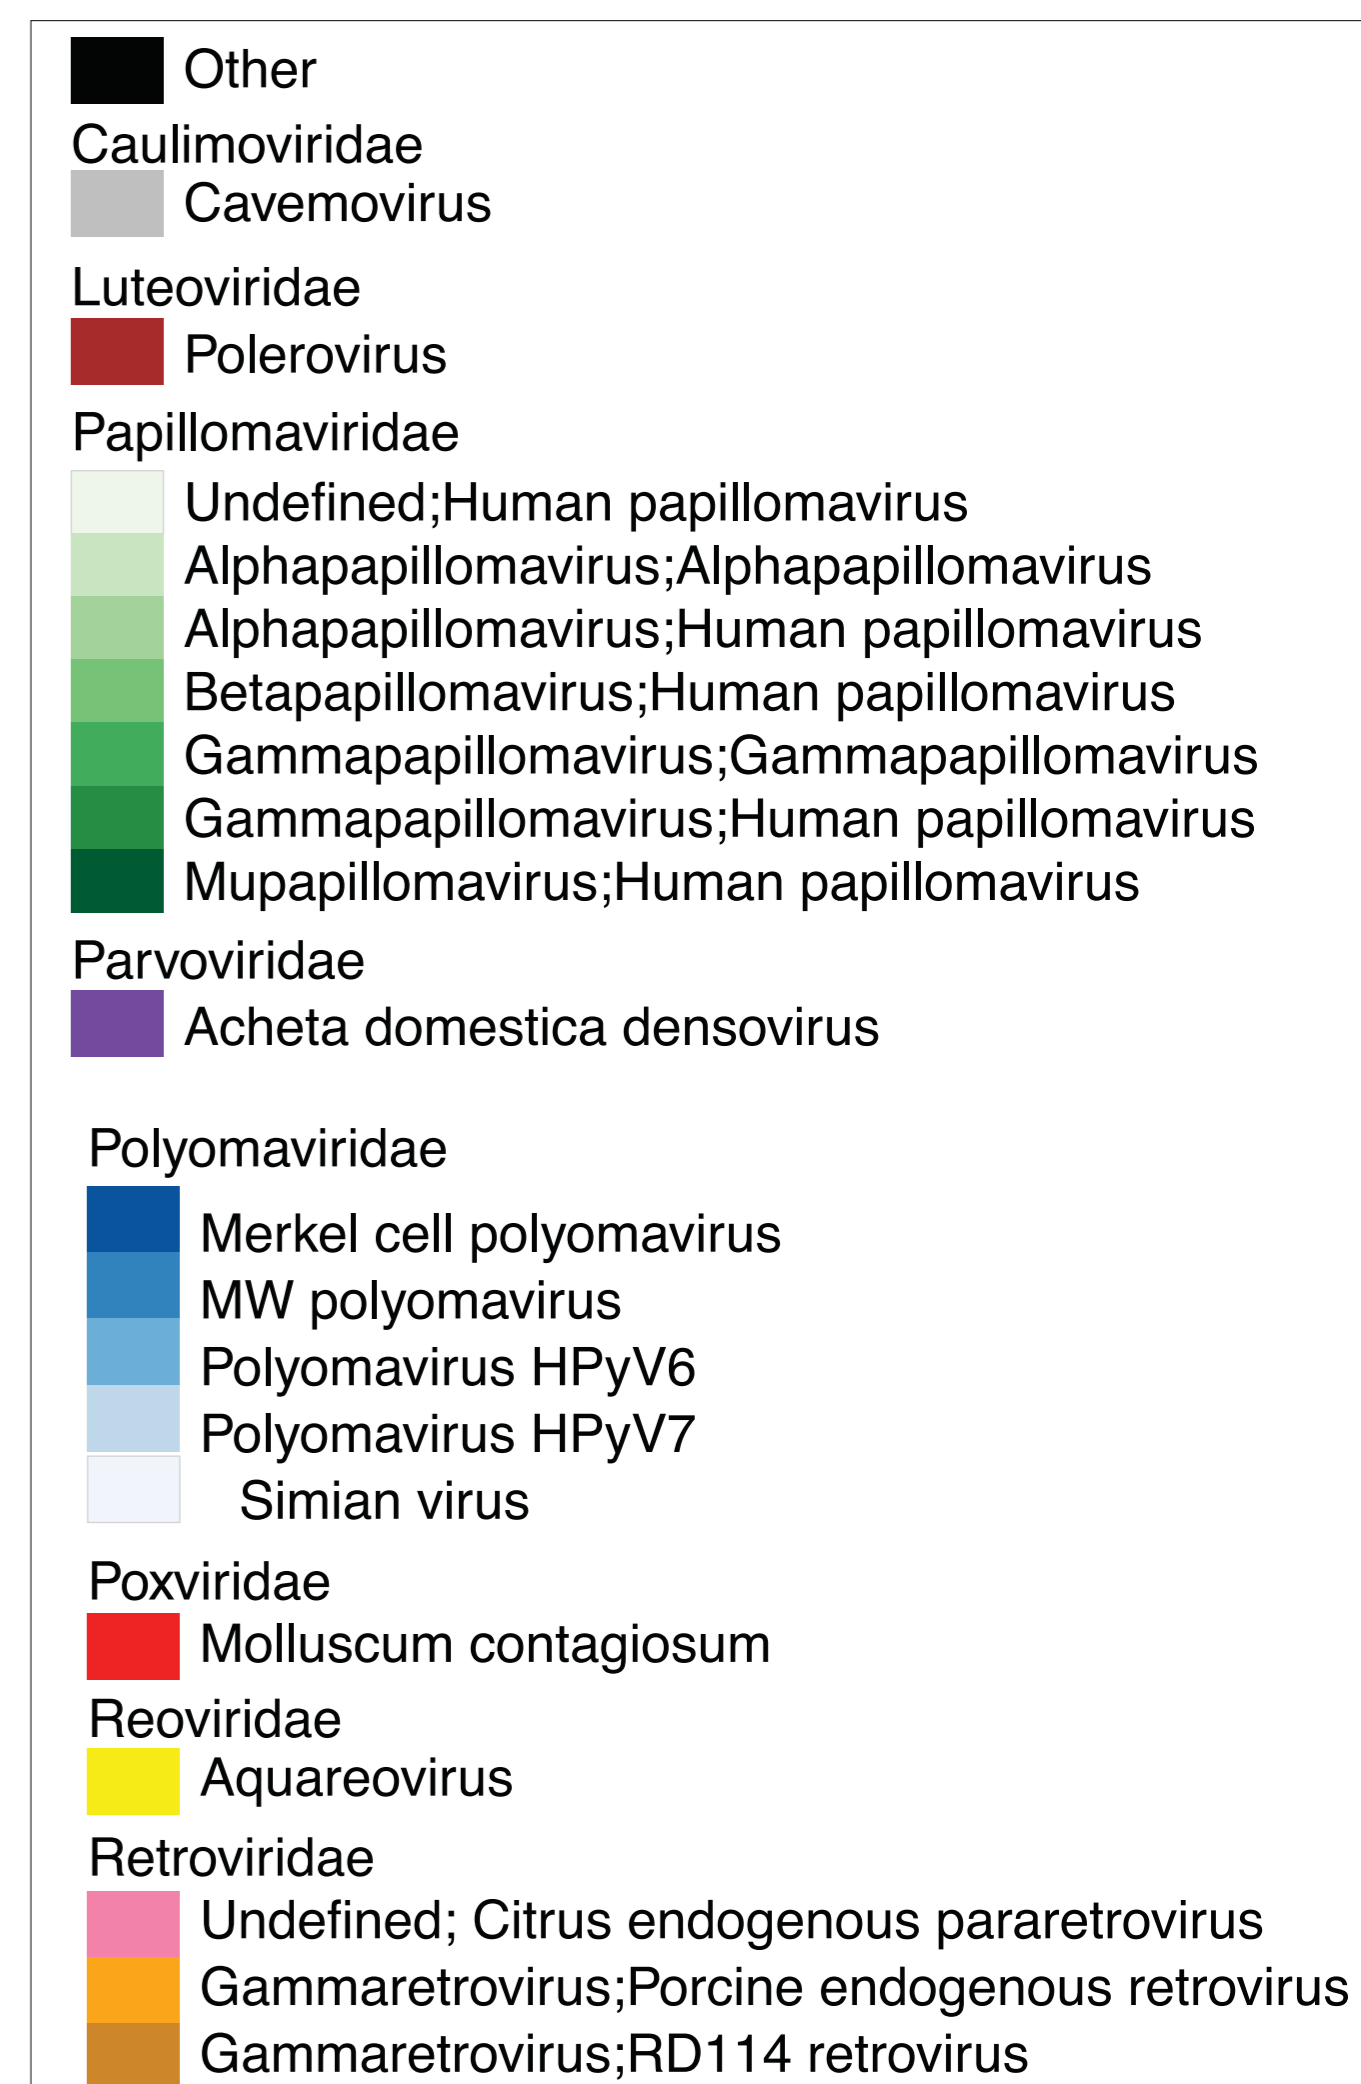

Supplement: NIHMS776449-supplement-5.pdf [file NIHMS776449-supplement-5.pdf]

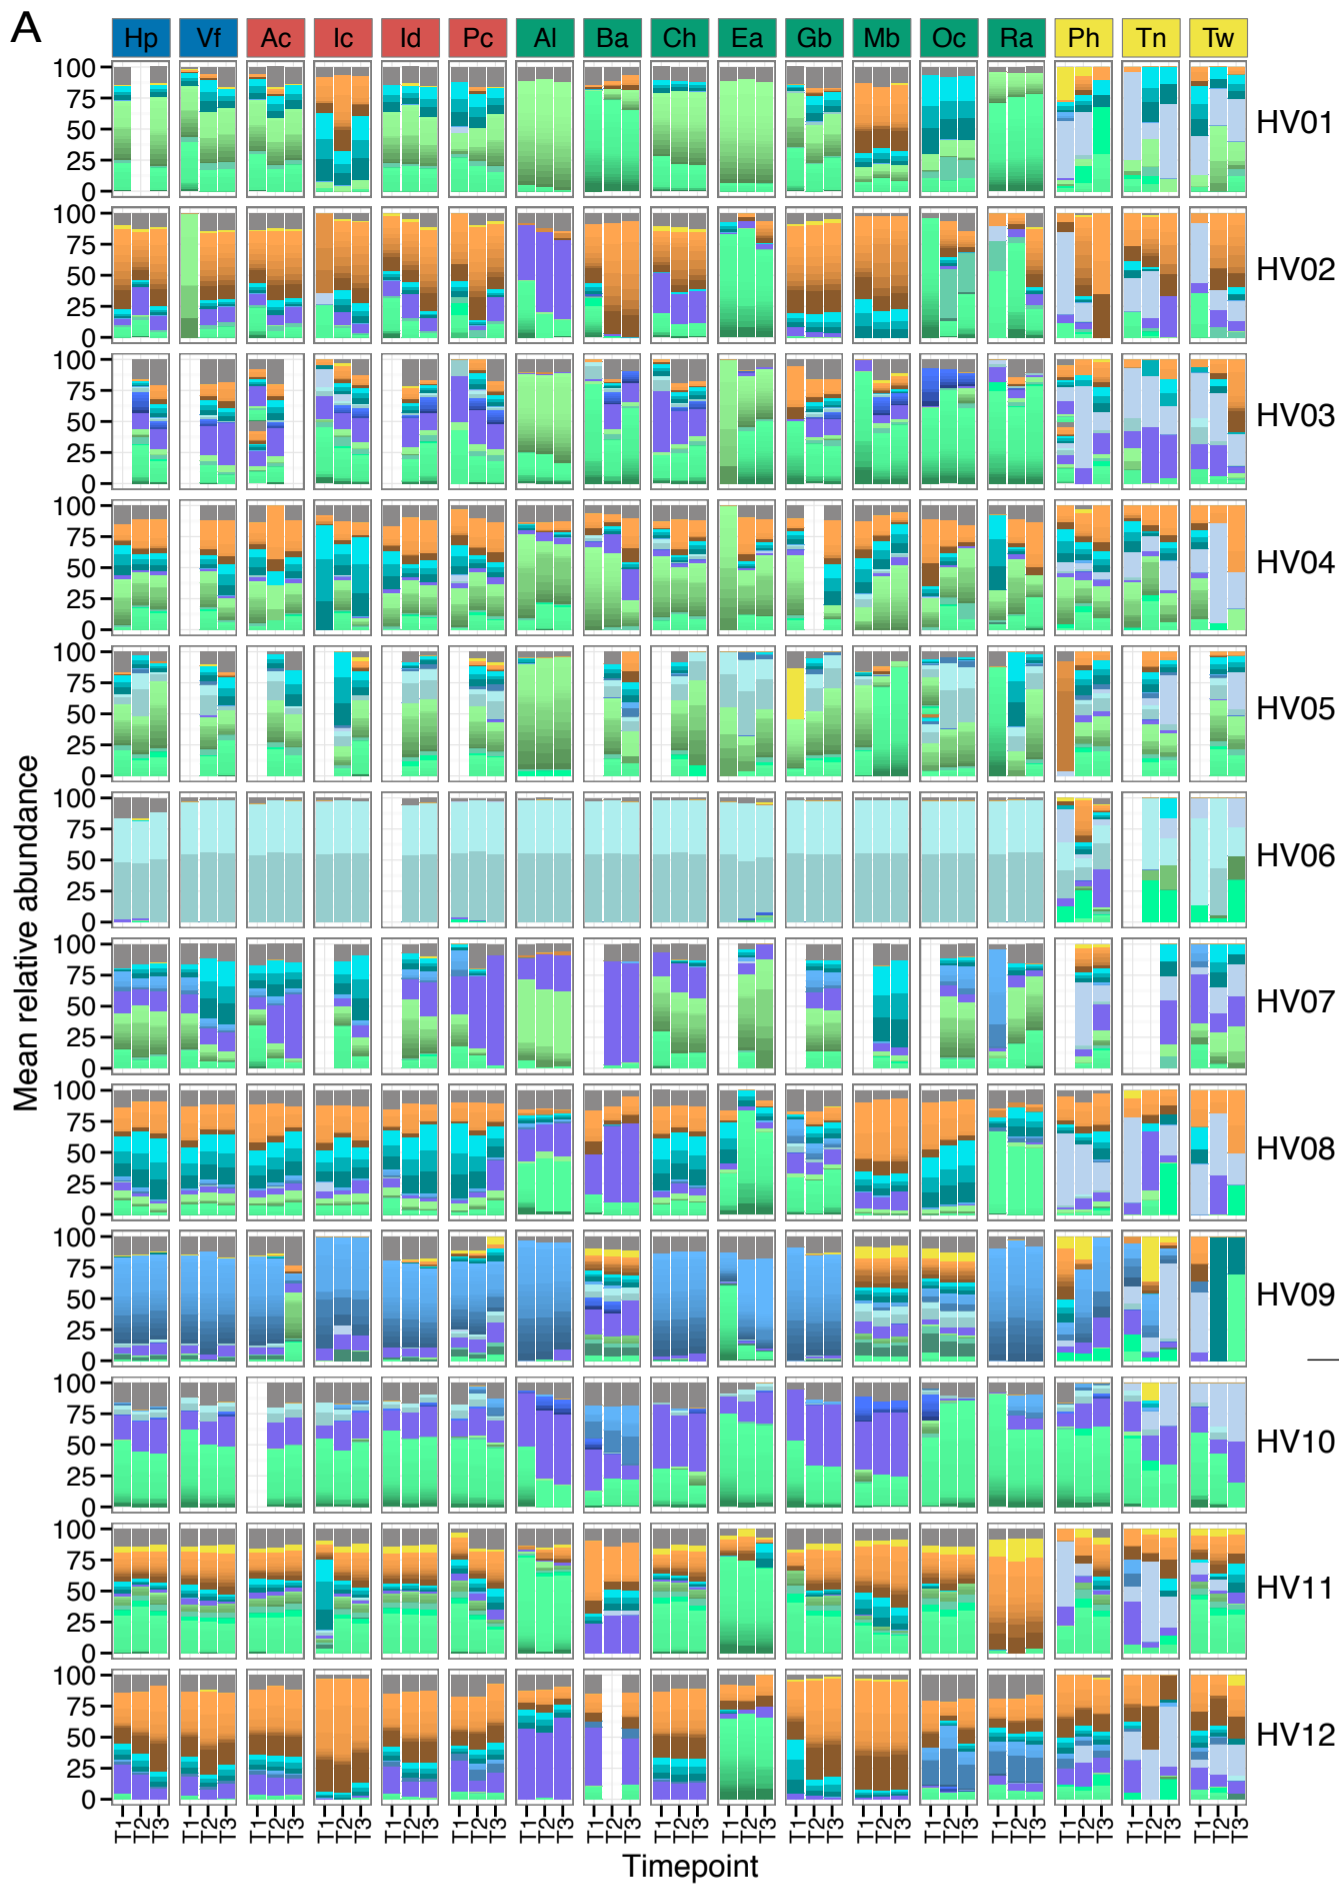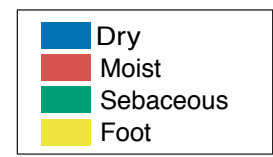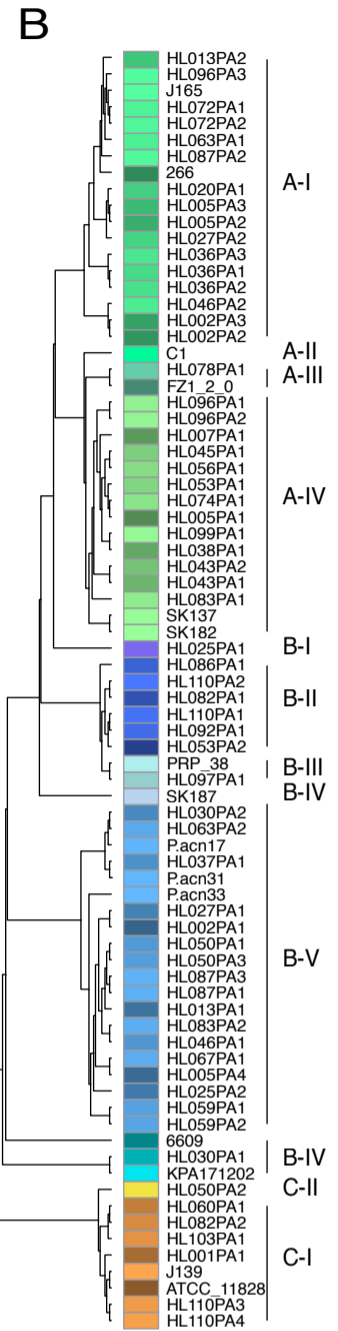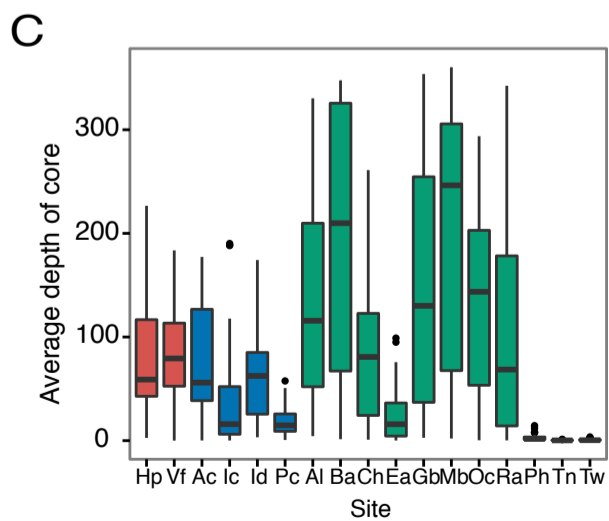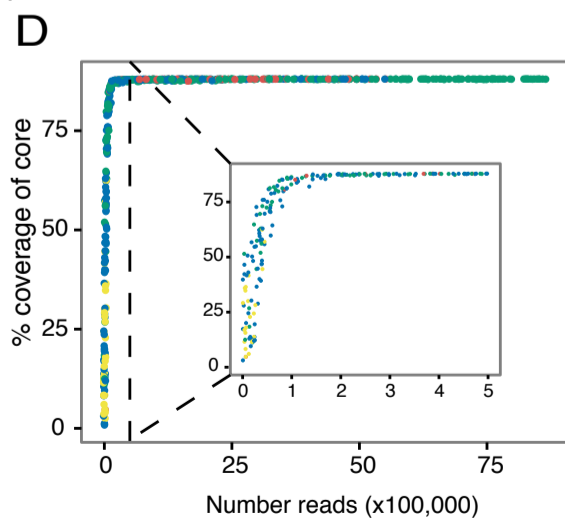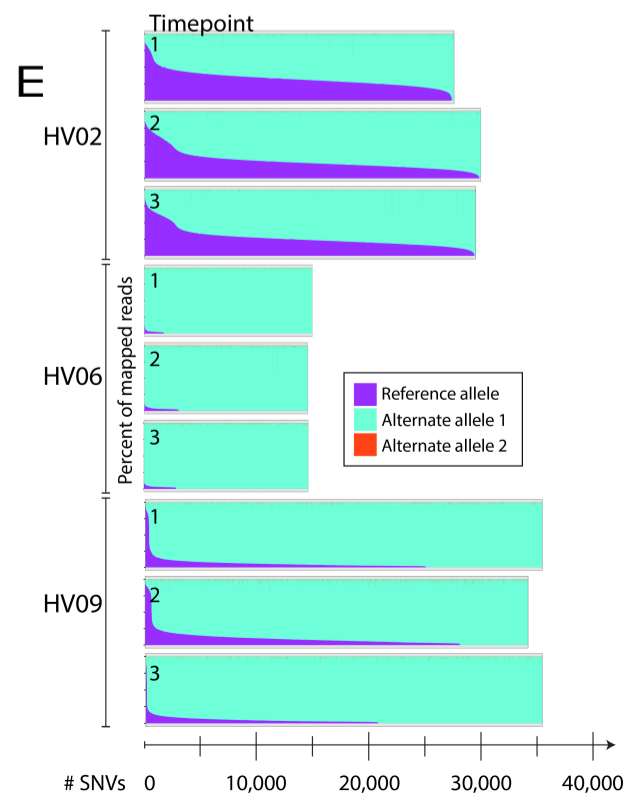

Supplement: NIHMS776449-supplement-6.pdf [file NIHMS776449-supplement-6.pdf]

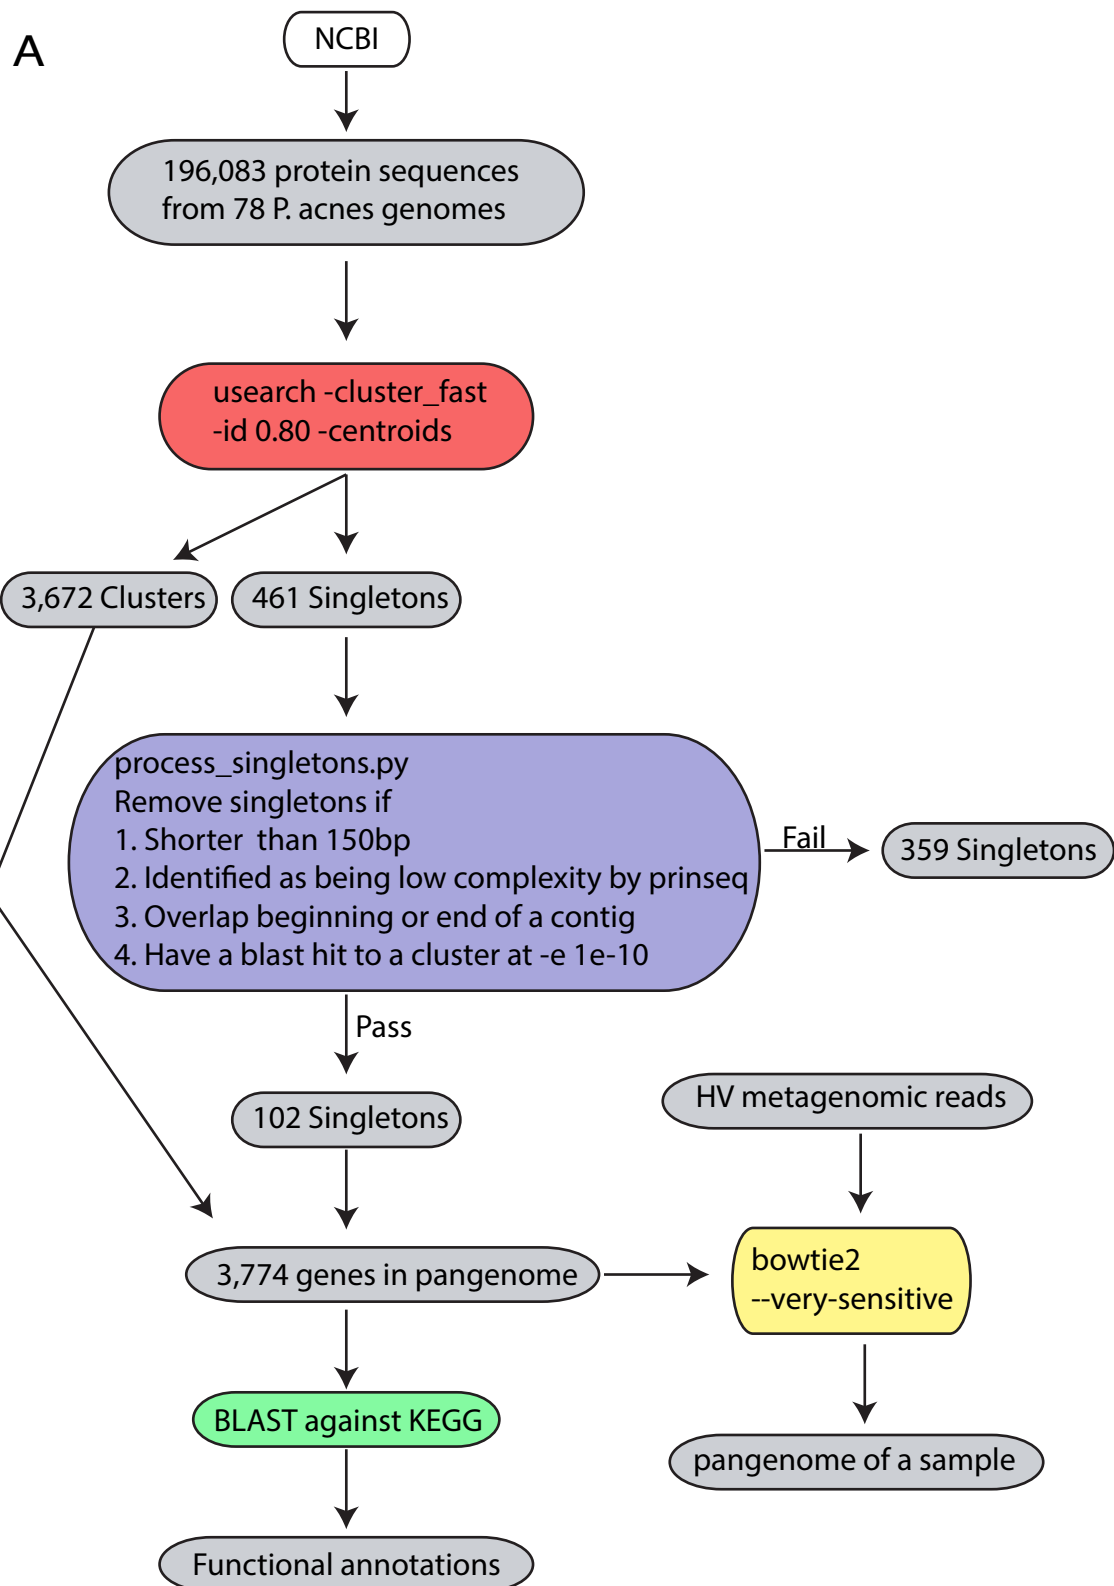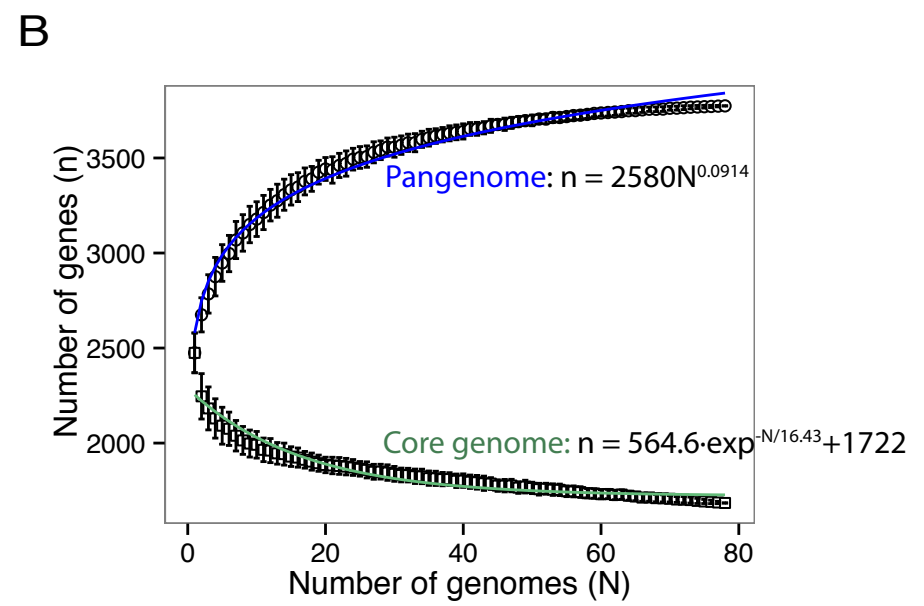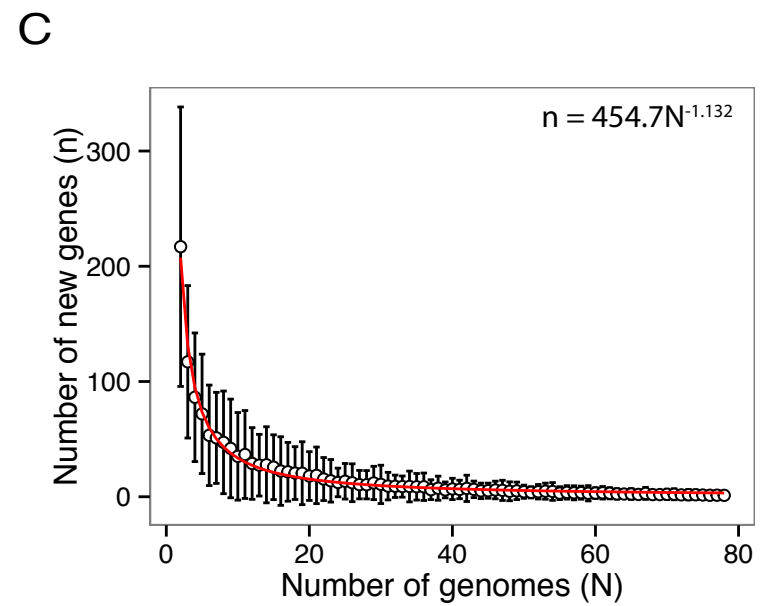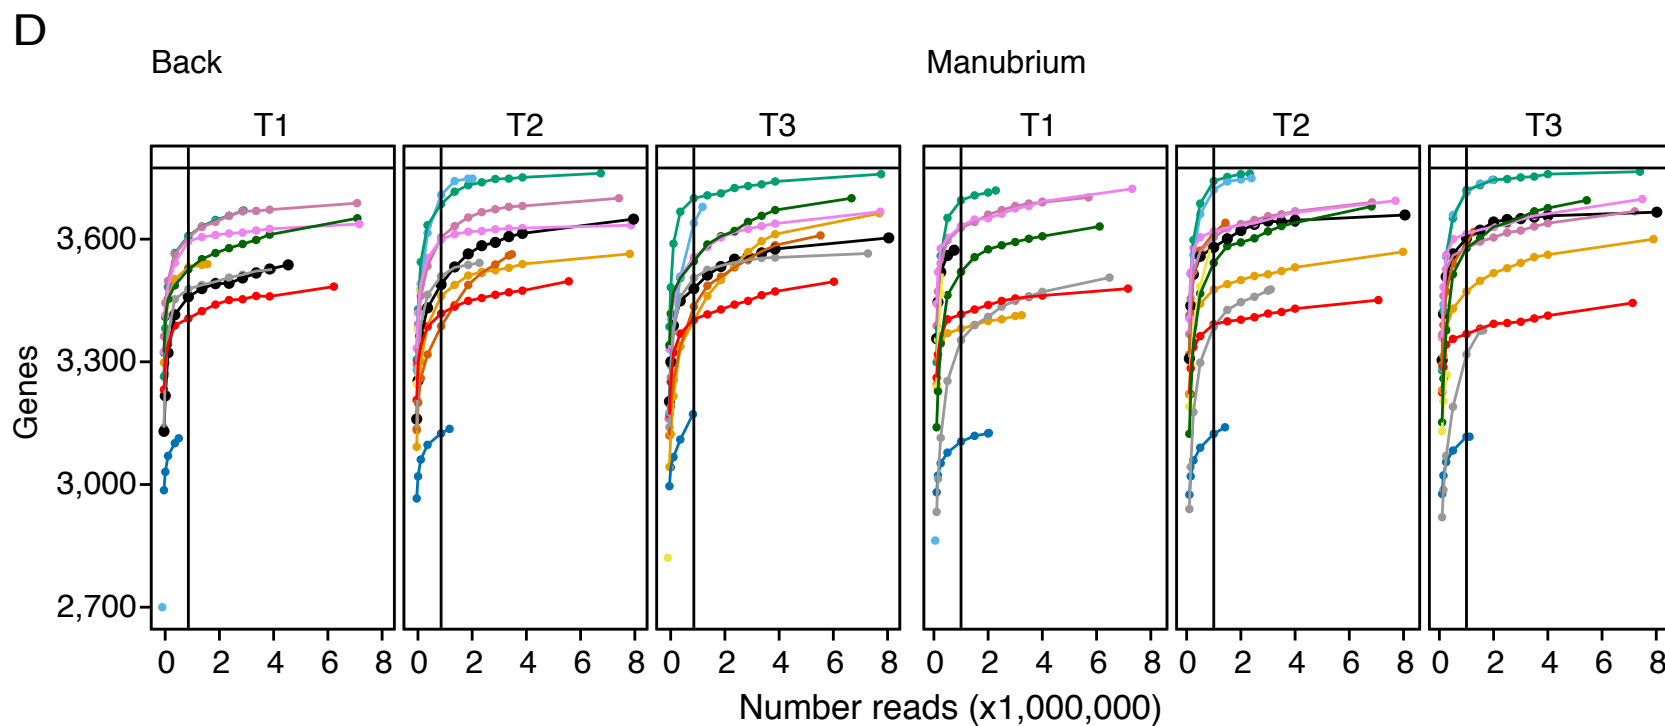

Supplement: NIHMS776449-supplement-7.pdf [file NIHMS776449-supplement-7.pdf]

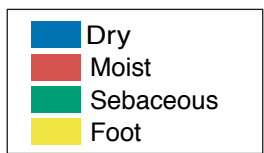

**B**

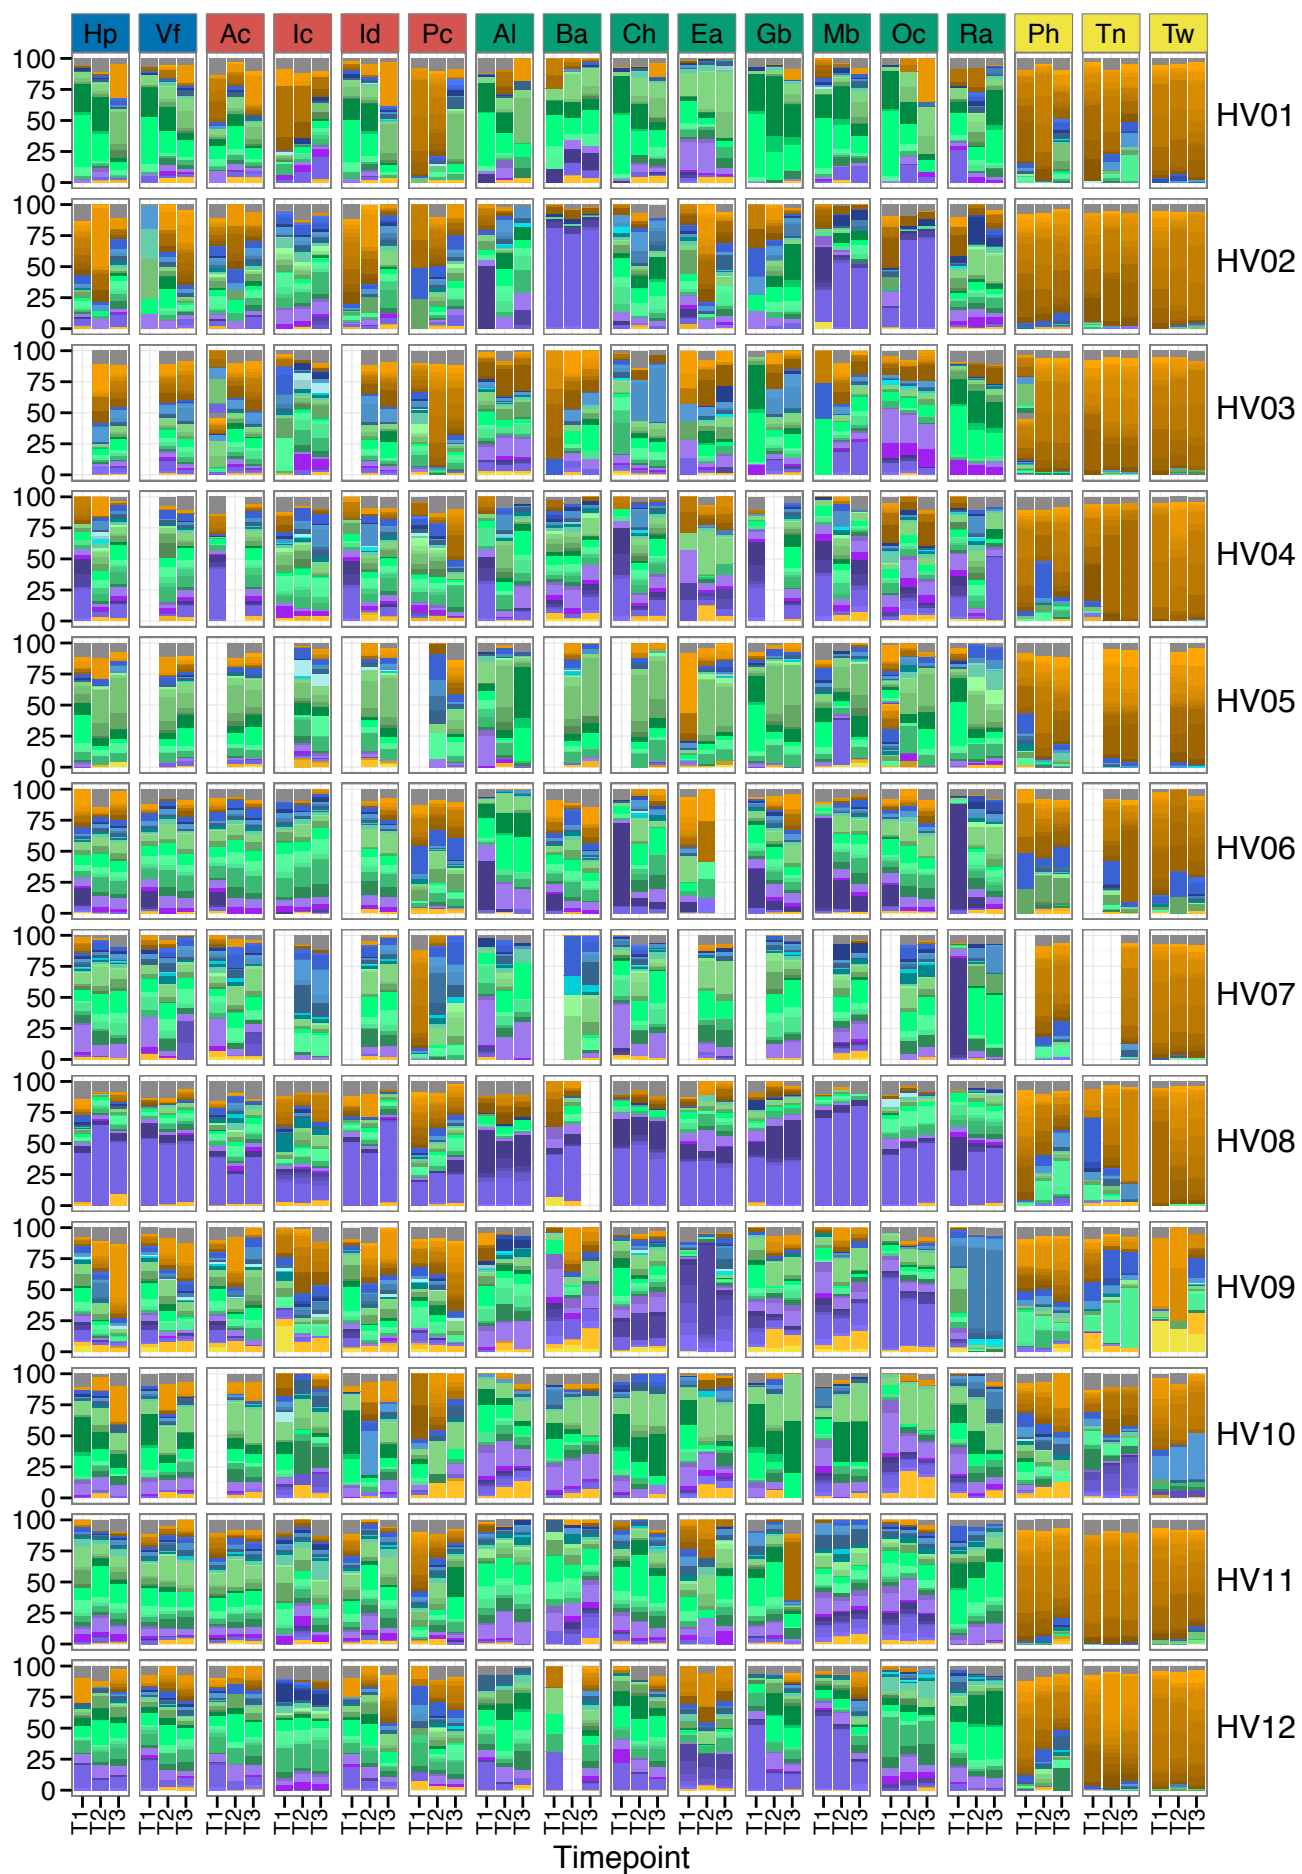

**A**

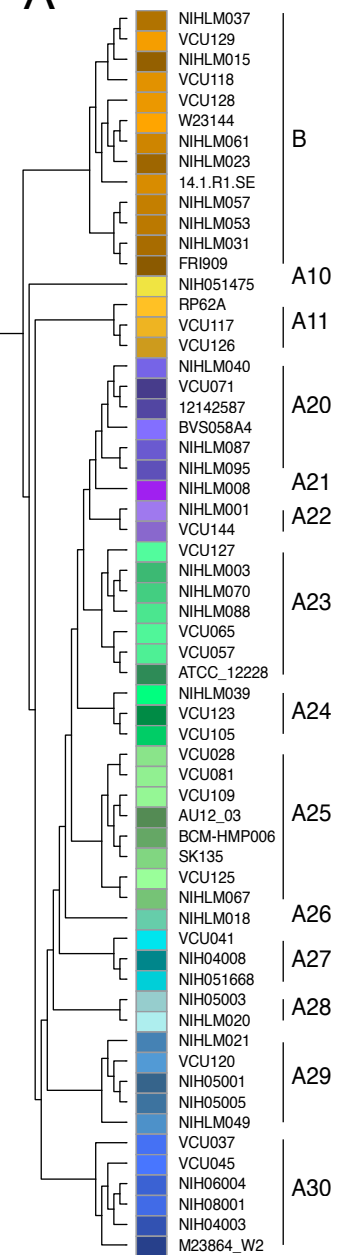

**C**

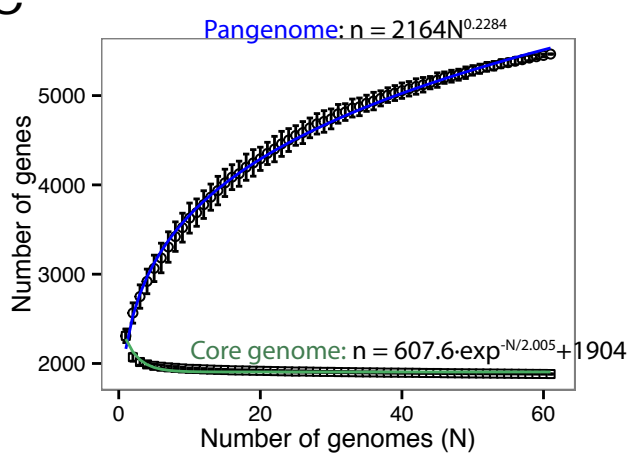

**D**

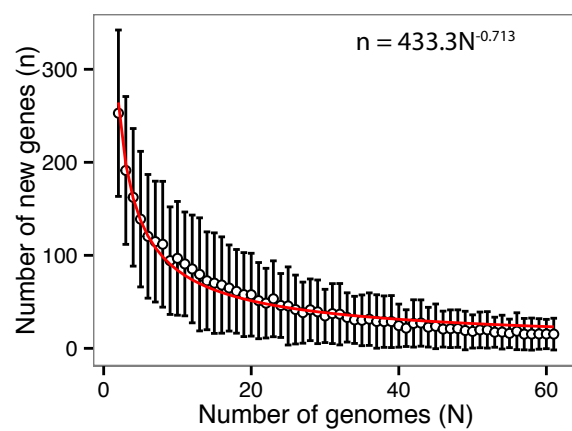

**E**

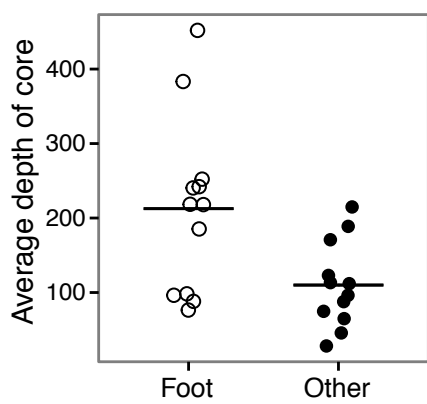

**F**

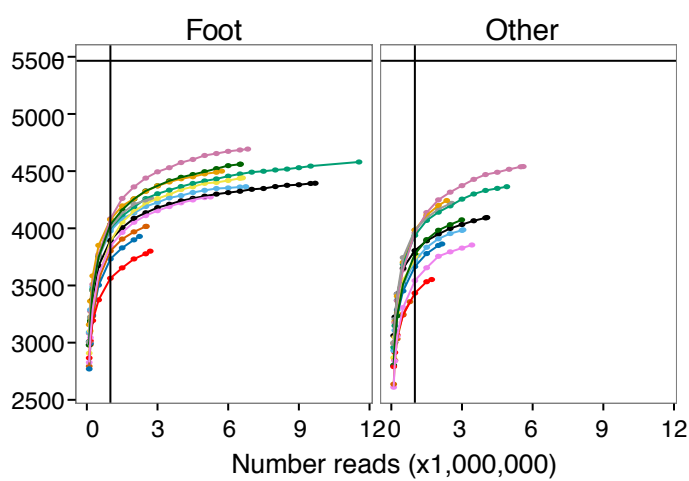

Supplement: NIHMS776449-supplement-8.pdf [file NIHMS776449-supplement-8.pdf]
